# Supplementary material
Source: PubMed Central journal article supplement (PMC2548295)
Supplement: NIHMS64019-supplement-1si20051102_06.pdf [file NIHMS64019-supplement-1si20051102_06.pdf]

# A Direct Catalytic Asymmetric Mannich-type Reaction via a Dinuclear Zinc Catalyst: Synthesis of Either *anti*- or *syn*- $\beta$ -Amino Alcohols

Barry M. Trost,<sup>a</sup> Jaray Jaratjaroonphong,<sup>b</sup> and Vichai Reutrakul<sup>\*b</sup>

<sup>a</sup>Department of Chemistry, Stanford University, Stanford, California 94305-5080

<sup>b</sup>Department of Chemistry, Faculty of Science, Mahidol University, Rama VI Road, Bangkok 10400, Thailand

## Supplemental Information

### Experimental Section

#### General

All reactions were performed under an atmosphere of nitrogen or argon, unless otherwise indicated. Solvents were freshly purified by passage through an aluminum column before used. Diethylzinc (Et<sub>2</sub>Zn) was purchased from Aldrich (Sure/Seal bottle 1.1 M in toluene). Chiral ligands **1a-c** were synthesized as reported before.<sup>S1</sup>

Flash chromatography was performed on silica gel (EM Science, Kieselgel 60, 230-400 mesh, ASTM) or neutral alumina (Fluka, aluminum Oxide, type 507, Brockmann grade III, 6% hydrate) using compressed air. Radial chromatography on a chromatotron was performed with Merck silica gel 60 F<sub>254</sub> (Art.7749). Analytical thin layer chromatography was performed using glass-backed plates coated with 0.2 mm silica (E. Merck, DC-Plasrikfolien, kieselgel 60 F<sub>254</sub>). Melting points were determined in open capillary tubes using a Thomas-Hoover apparatus. NMR spectra were obtained on Varian Germini-200 (200 MHz) and 300 (300 MHz), Mercury-400 (400 MHz) or Unity Inova-500 (500 MHz) instruments and are calibrated to TMS (0 ppm) or residual solvent peak: proton (chloroform 7.26 ppm) and carbon (chloroform 77.1 ppm). Infrared (IR) data were recorded as films on sodium chloride plates on a Perkin-Elmer Paragon 500 FT-IR spectrometer. Elemental analyses (Anal.) were performed by M.-H.-W. Laboratories, Phoenix, Arizona. High resolution mass spectra (HRMS) were obtained from the Mass Spectrometry Resource, School of Pharmacy, University of California-San Francisco on a Kratos MS9 spectrometer. Chiral HPLC analyses were performed on a Thermo Separation Products Spectra Series P-100 or P-200 and UV100 (254 nm) using Chiralcel columns (AD, OD), or Chiralpak column (AS) eluting with heptane/*iso*-propanol mixtures indicated. Optical rotations were measured on a Jasco DIP-1000 digital polarimeter using 5 cm cells and the sodium D line (589 nm) at ambient temperature in the solvent and concentration indicated.

#### Asymmetric Mannich-type reaction

#### General procedure for the catalytic asymmetric Mannich-type reaction with Dpp-imine **4** promoted by dinuclear zinc catalyst **2**.

**4** Crushed molecular sieves (60 mg) were flame-dried under vacuum. After cooling down to room temperature, ligand **1a** was added (7 mg, 0.0105 mmol) and nitrogen gas was refilled. THF (0.3 mL) was then added. To this suspension was added dropwise a solution of Et<sub>2</sub>Zn (19  $\mu$ L, 0.021 mmol, 1.1 M in Toluene) at room temperature and continued to stir for 30 minutes. After cooling down to -30 °C, a solution of hydroxyketone **3a** (82 mg, 0.60 mmol) in THF (0.35 mL) and Dpp-imine **4a**<sup>S2-4</sup> (93 mg, 0.3 mmol) in THF (0.35 mL) was added successively. After stirring at -30 °C for 24 hours, the reaction mixture was diluted with Et<sub>2</sub>O (6 mL) and then a phosphate buffer (pH = 7) solution (3 mL) was added.

After stirring for 30 minutes, the phases were separated and the aqueous phase was extracted with Et<sub>2</sub>O (1 mL x 2). The combined organics were washed with brine (1.5 mL), dried over MgSO<sub>4</sub>, filtered and concentrated to give a crude mixture of the Mannich adducts. The diastereomeric ratio was determined by <sup>1</sup>H NMR analysis of the crude product. The crude mixture was purified by flash silica gel column chromatography [Petroleum ether/EtOAc 1:1 and then EtOAc 100 %] to yield **5a** [115 mg, 86% yield, *anti/syn* = >5:1, 94% ee (*anti* isomer)].

### Synthesis of (2*S*, 3*S*)-3-cyclohexyl-2-hydroxy-1-phenyl-3-(*N*-diphenylphosphinoylamino)-1-propanone (**5a**)

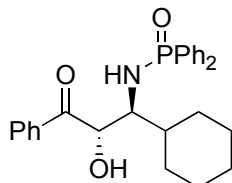

Compound **5a**: a white solid; m.p. 71-72 °C; R<sub>f</sub> 0.39 (EtOAc); t<sub>r</sub> = 25.1 min (minor) and 28.0 min (major), (Chiralcel AD, λ = 254 nm, heptane/*i*-PrOH = 84:16, 1.0 mL/min); [α]<sub>D</sub><sup>25</sup> -2.8 (c 1.77, CHCl<sub>3</sub>, 94% ee); <sup>1</sup>H NMR (500 MHz, CDCl<sub>3</sub>) δ 8.20-7.94 (m, 4H), 7.92 (dd, *J* = 8.1, 1.3 Hz, 2H), 7.59-7.44 (m, 7H), 7.41 (t, *J* = 8.0 Hz, 2H), 5.32 (br s, 1H), 5.23 (br d, *J* = 5.0 Hz, 1H), 4.05 (dd, *J* = 12.0, 5.5 Hz, 1H), 3.22-3.12 (m, 1H), 2.11-2.03 (m, 1H), 1.74-1.66 (m, 2H), 1.59-1.50 (m, 2H), 1.50-1.42 (m, 1H), 1.29-1.22 (m, 1H), 1.22-1.11 (m, 1H), 1.10-0.97 (m, 2H), 0.96-0.84 (m, 2H); <sup>13</sup>C NMR (125 MHz, CDCl<sub>3</sub>) δ 200.6, 134.9, 133.8, 133.0, 132.9, 132.8, 132.2, 132.1, 132.0, 131.6, 129.1, 128.83, 128.78, 128.73, 128.6, 128.5, 75.0, 60.6, 40.3, 40.2, 31.2, 30.2, 26.2, 26.2, 26.1; IR (film): ν = 3331, 1679, 1597, 1439, 1266, 1180, 1123, 1129 cm<sup>-1</sup>; HRMS (EI) *m/z* 447.1942 [M<sup>+</sup>; calcd for C<sub>27</sub>H<sub>30</sub>NO<sub>3</sub>P, 447.1963]. The relative stereochemistry of major diastereomer was determined to be *anti* by NOE observation (8.9%) as shown below, after conversion to the corresponding cyclic carbamate.<sup>s5,s6</sup> The absolute stereochemistry was determined by utilization of the amine in the *O*-methyl mandelic amide formation.<sup>s7</sup>

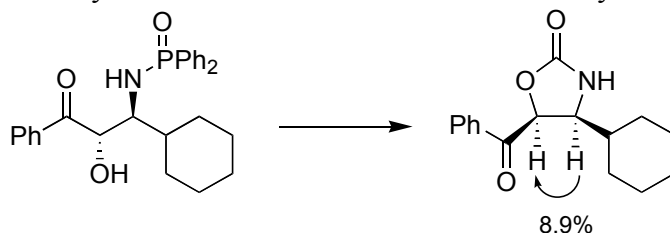

### Synthesis of (2*S*, 3*S*)-3-cyclopropyl-2-hydroxy-1-phenyl-3-(*N*-diphenylphosphinoylamino)-1-propanone (**5b**)

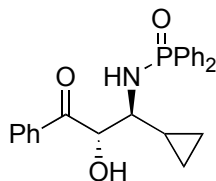

Compound **5b**: a colorless oil; R<sub>f</sub> 0.34 (EtOAc); t<sub>r</sub> = 11.6 min (major) and 31.7 min (minor), (Chiralcel OD, λ = 254 nm, heptane/*i*-PrOH = 90:10, 1.0 mL/min); [α]<sub>D</sub><sup>24</sup> +46.3 (c 1.50, CHCl<sub>3</sub>, 83% ee); <sup>1</sup>H NMR (500 MHz, CDCl<sub>3</sub>) δ 8.09-7.92 (m, 4H), 7.78 (d, *J* = 7.5 Hz, 2H), 7.60-7.42 (m, 7H), 7.37 (t, *J* = 7.8 Hz, 2H), 5.38 (dd, *J* = 6.5, 2.0 Hz, 1H), 4.40 (d, *J* = 6.5 Hz, 1H), 3.97 (dd, *J* = 11.3, 7.3 Hz, 1H), 2.84-2.74 (m, 1H), 1.04-0.94 (m, 1H), 0.48-0.38 (m, 1H), 0.15-0.08 (m, 1H), -0.35- -0.43 (m, 1H); <sup>13</sup>C NMR (125 MHz, CDCl<sub>3</sub>) δ 199.3, 134.1, 134.0, 133.4, 132.7, 132.6, 132.5, 132.4, 132.1, 132.0, 131.7, 129.0, 128.8, 128.71, 128.68, 128.6, 128.5, 77.6, 59.7, 12.3, 12.2, 5.0, 3.4; IR (film): ν = 3334, 1681, 1596,

1438, 1268, 1189, 1122, 1073, 967  $\text{cm}^{-1}$ ; LRMS (ESI)  $m/z$  406.2  $\{[M+H]^+\}$ ; calcd for  $\text{C}_{24}\text{H}_{25}\text{NO}_3\text{P}$ , 406.2}; HRMS (EI)  $m/z$  300.1154  $\{[M-\text{PhCO}]^+\}$ ; calcd for  $\text{C}_{17}\text{H}_{19}\text{NO}_2\text{P}$ , 300.1153}.

### Synthesis of (2*S*, 3*S*)-2-hydroxy-4-methyl-1-phenyl-3-(*N*-diphenylphosphinoylamino)-1-pentanone (5c)

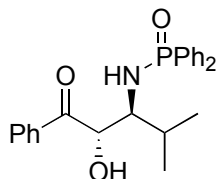

**Compound 5c**: a colorless oil;  $R_f$  0.13 (Pet. ether/EtOAc 1:1);  $t_r$  = 30.2 min (minor; not found) and 35.8 min (major), (Chiralcel AD,  $\lambda$  = 254 nm, heptane/*i*-PrOH = 80:20, 1.0 mL/min);  $[\alpha]_D^{24}$  +7.48 (c 3.60,  $\text{CHCl}_3$ , 100% ee);  $^1\text{H}$  NMR (500 MHz,  $\text{CDCl}_3$ )  $\delta$  8.03-7.94 (m, 4H), 7.90 (dd,  $J$  = 8.0, 1.0 Hz, 2H), 7.59-7.38 (m, 9H), 5.31 (dd,  $J$  = 6.8, 2.0 Hz, 1H), 5.06 (br d,  $J$  = 6.8 Hz, 1H), 4.03 (dd,  $J$  = 11.5, 5.5 Hz, 1H), 3.26-3.17 (m, 1H), 1.81-1.69 (m, 1H), 0.98 (d,  $J$  = 6.8 Hz, 3H), 0.69 (d,  $J$  = 6.8 Hz, 3H);  $^{13}\text{C}$  NMR (125 MHz,  $\text{CDCl}_3$ )  $\delta$  200.5, 134.6, 133.8, 133.0, 132.8, 132.7, 132.2, 132.1, 132.0, 131.9, 131.8, 130.8, 129.0, 128.8, 128.7, 128.5, 128.4, 75.9, 60.6, 30.4, 30.3, 21.3, 19.7; IR (film):  $\nu$  = 3331, 1678, 1597, 1438, 1261, 1181, 1124, 1109, 1071  $\text{cm}^{-1}$ ; LRMS (ESI)  $m/z$  408.2  $\{[M+H]^+\}$ ; calcd for  $\text{C}_{24}\text{H}_{26}\text{NO}_3\text{P}$ , 408.2}; HRMS (EI)  $m/z$  302.1287  $\{[M-\text{PhCO}]^+\}$ ; calcd for  $\text{C}_{17}\text{H}_{21}\text{NO}_2\text{P}$ , 302.1310}; Anal. Calcd for  $\text{C}_{24}\text{H}_{26}\text{NO}_3\text{P}$ : C, 70.75; H, 6.43; N, 3.44. Found: C, 70.94; H, 6.34; N, 3.19.

### Synthesis of (2*S*, 3*S*)-2-hydroxy-5-methyl-1-phenyl-3-(*N*-diphenylphosphinoylamino)-1-hexanone (5d)

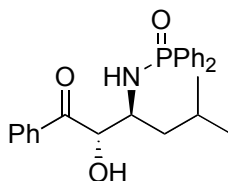

**Compound 5d**: a white solid; m.p. 60-61  $^\circ\text{C}$ ;  $R_f$  0.20 (Pet. ether/EtOAc 1:1, 2 elutions);  $t_r$  = 25.7 min (major) and 36.2 min (minor), (Chiralcel AD,  $\lambda$  = 254 nm, heptane/*i*-PrOH = 80:20, 1.0 mL/min);  $[\alpha]_D^{24}$  +20.21 (c 4.21,  $\text{CHCl}_3$ , 96% ee);  $^1\text{H}$  NMR (500 MHz,  $\text{CDCl}_3$ )  $\delta$  8.03-7.96 (m, 4H), 7.85 (dd,  $J$  = 8.5, 1.5 Hz, 2H), 7.59-7.42 (m, 7H), 7.40 (t,  $J$  = 7.8 Hz, 2H), 5.43 (br s, 1H), 4.37 (br s, 1H), 3.69 (dd,  $J$  = 12.0, 6.0 Hz, 1H), 3.52-3.42 (m, 1H), 1.73-1.62 (m, 1H), 1.51-1.43 (m, 1H), 0.77-0.71 (m, 4H), 0.22 (t,  $J$  = 6.0 Hz, 3H);  $^{13}\text{C}$  NMR (125 MHz,  $\text{CDCl}_3$ )  $\delta$  200.2, 134.1, 133.9, 133.2, 132.7, 132.6, 132.4, 132.23, 132.16, 132.03, 131.97, 131.9, 131.3, 128.9, 128.8, 128.7, 128.6, 128.5, 77.7, 60.6, 53.2, 39.9, 39.8, 23.9, 23.7, 21.0; IR (film):  $\nu$  = 3331, 1679, 1597, 1579, 1439, 1409, 1270, 1189, 1124, 1108, 983  $\text{cm}^{-1}$ ; HRMS (EI)  $m/z$  420.1720  $\{[M-H]^+\}$ ; calcd for  $\text{C}_{25}\text{H}_{27}\text{NO}_3\text{P}$ , 420.1729}.

### Synthesis of (2*S*, 3*S*)-2-hydroxy-1,5-diphenyl-3-(*N*-diphenylphosphinoylamino)-1-pentanone (5e)

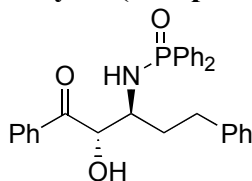

**Compound 5e**: a colorless oil;  $R_f$  0.40 (EtOAc);  $t_r$  = 17.0 min (major) and 35.1 min (minor), (Chiralcel OD,  $\lambda$  = 254 nm, heptane/*i*-PrOH = 90:10, 1.0 mL/min);  $[\alpha]_D^{20}$  +9.31 (c 4.27,  $\text{CHCl}_3$ , 96% ee);  $^1\text{H}$  NMR (500 MHz,  $\text{CDCl}_3$ )  $\delta$  8.04-7.95 (m, 4H), 7.75 (dd,  $J$  = 8.5, 1.0 Hz, 2H), 7.62-7.49 (m, 5H), 7.49-7.44

(m, 2H), 7.35 (t,  $J = 7.8$  Hz, 2 H), 7.11-7.02 (m, 3H), 6.87 (dd,  $J = 8.0, 1.5$  Hz, 2H), 5.41 (br s, 1H), 4.32 (br s, 1H), 3.80 (dd,  $J = 11.8, 6.5$  Hz, 1H), 3.53-3.44 (m, 1H), 2.77 (ddd,  $J = 14.1, 9.5, 5.0$  Hz, 1H), 2.35 (ddd,  $J = 14.1, 9.5, 7.0$  Hz, 1H), 1.87-1.77 (m, 1H), 1.42-1.32 (m, 1H);  $^{13}\text{C}$  NMR (125 MHz,  $\text{CDCl}_3$ )  $\delta$  199.8, 134.2, 133.5, 133.2, 132.64, 132.56, 132.4, 132.2 br, 132.04, 131.97, 131.4, 128.9, 128.8, 128.75, 128.71, 128.6, 128.3, 128.2, 125.8, 77.5, 54.7, 32.1, 32.04, 31.98; IR (film):  $\nu = 3319, 1684, 1597, 1438, 1267, 1183, 1123$   $\text{cm}^{-1}$ ; HRMS (EI)  $m/z$  469.1810 [ $\text{M}^+$ ; calcd for  $\text{C}_{29}\text{H}_{28}\text{NO}_3\text{P}$ , 469.1807].

#### Synthesis of (2*S*, 3*S*)-2-hydroxy-1-phenyl-3-(*N*-diphenylphosphinoylamino)-1-nonanone (5f)

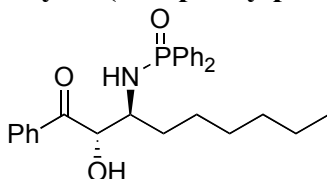

Compound **5f**: a colorless oil;  $R_f$  0.27 (EtOAc);  $t_r = 9.0$  min (major) and 17.3 min (minor), (Chiralcel OD,  $\lambda = 254$  nm, heptane/*i*-PrOH = 90:10, 1.0 mL/min);  $[\alpha]_D^{23} +46.2$  (c 2.00,  $\text{CHCl}_3$ , 96% ee);  $^1\text{H}$  NMR (500 MHz,  $\text{CDCl}_3$ )  $\delta$  8.04-7.96 (m, 4H), 7.88 (d,  $J = 7.0$  Hz, 2H), 7.60-7.37 (m, 9H), 5.44 (br s, 1H), 4.30 (br s, 1H), 3.69 (dd,  $J = 11.8, 6.3$  Hz, 1H), 3.48-3.38 (m, 1H), 1.53-1.42 (m, 1H), 1.42-1.32 (m, 1H), 1.17-0.86 (m, 8H), 0.77 (t,  $J = 7.0$  Hz, 3H);  $^{13}\text{C}$  NMR (125 MHz,  $\text{CDCl}_3$ )  $\delta$  200.1, 134.1, 133.8, 132.7, 132.6, 132.4, 132.2, 132.07, 131.98, 131.9, 128.9, 128.8, 128.7, 128.6, 128.5, 77.5, 55.0, 31.5, 30.4, 30.3, 28.9, 26.0, 22.6, 14.1; IR (film):  $\nu = 3331, 1682, 1597, 1439, 1269, 1183, 1124, 1109$   $\text{cm}^{-1}$ ; HRMS (EI)  $m/z$  449.2122 [ $\text{M}^+$ ; calcd for  $\text{C}_{27}\text{H}_{32}\text{NO}_3\text{P}$ , 449.2120].

#### Synthesis of (2*S*, 3*S*)-3-cyclohexyl-1-(2-furyl)-2-hydroxy-3-(*N*-diphenylphosphinoylamino)-1-propanone (5g)

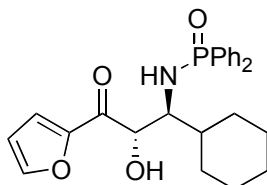

Compound **5g**: a pale yellow oil;  $R_f$  0.46 (EtOAc);  $t_r = 18.0$  min (minor) and 28.2 min (major), (Chiralcel AD,  $\lambda = 254$  nm, heptane/*i*-PrOH = 80:20, 1.0 mL/min);  $[\alpha]_D^{25} -14.36$  (c 1.70,  $\text{CHCl}_3$ , 90% ee);  $^1\text{H}$  NMR (500 MHz,  $\text{CDCl}_3$ )  $\delta$  7.96-7.86 (m, 4H), 7.56-7.40 (m, 8H), 6.50 (ddd,  $J = 3.8, 2.0, 0.5$  Hz, 1H), 5.93 (br d,  $J = 8.8$  Hz, 1H), 4.86 (br dd,  $J = 8.8, 2.0$  Hz, 1H), 3.93 (dd,  $J = 12.0, 5.0$  Hz, 1H), 3.16-3.06 (m, 1H), 2.10-2.03 (m, 1H), 1.72-1.64 (m, 1H), 1.62-1.50 (m, 3H), 1.50-1.42 (m, 1H), 1.20-0.78 (m, 5H);  $^{13}\text{C}$  NMR (125 MHz,  $\text{CDCl}_3$ )  $\delta$  189.1, 151.3, 147.3, 133.0, 132.9, 132.6, 132.3, 132.1, 131.93, 131.85, 131.6, 131.2, 130.2, 128.8, 128.7, 128.6, 128.5, 120.6, 112.5, 74.0, 61.5, 40.54, 40.48, 31.2, 30.4, 26.13, 26.10; IR (film):  $\nu = 3264, 1666, 1566, 1465, 1439, 1389, 1274, 1170, 1124, 1109, 1018, 911$   $\text{cm}^{-1}$ ; HRMS (EI)  $m/z$  437.1750 [ $\text{M}^+$ ; calcd for  $\text{C}_{25}\text{H}_{28}\text{NO}_4\text{P}$ , 437.1756].

#### Synthesis of (2*S*, 3*S*)-3-cyclohexyl-2-hydroxy-1-(2-methoxyphenyl)-3-(*N*-diphenylphosphinoylamino)-1-propanone (5h)

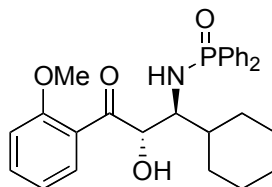

Compound **5h**: a pale yellow oil;  $R_f$  0.26 (EtOAc);  $t_r$  = 25.5 min (major) and 31.8 min (minor), (Chiralcel AD,  $\lambda$  = 254 nm, heptane/*i*-PrOH = 80:20, 1.0 mL/min);  $[\alpha]_D^{26}$  -3.67 (*c* 1.10, CHCl<sub>3</sub>, 56% ee); <sup>1</sup>H NMR (500 MHz, CDCl<sub>3</sub>)  $\delta$  7.97 (dd,  $J$  = 11.8, 7.8 Hz, 2H), 7.85 (dd,  $J$  = 12.0, 8.0 Hz, 2H), 7.61 (d,  $J$  = 7.5 Hz, 1H), 7.58-7.38 (m, 7H), 6.99 (t,  $J$  = 7.5 Hz, 1H), 6.89 (d,  $J$  = 8.5 Hz, 1H), 5.28 (br dd,  $J$  = 7.5, 3.0 Hz, 1H), 4.95 (br d,  $J$  = 7.5 Hz, 1H), 3.77 (dd,  $J$  = 11.8, 7.3 Hz, 1H), 3.69 (s, 3H), 3.27-3.17 (m, 1H), 2.02-1.92 (m, 1H), 1.74-1.66 (m, 1H), 1.62-1.52 (m, 2H), 1.40-0.92 (m, 7H); <sup>13</sup>C NMR (125 MHz, CDCl<sub>3</sub>)  $\delta$  202.8, 158.2, 134.2, 133.5, 132.5, 132.4, 132.23, 132.16, 132.05, 131.9, 131.5, 130.7, 128.7, 128.6, 128.5, 128.4, 126.2, 120.9, 111.7, 78.7, 59.3, 55.7, 40.82, 40.76, 31.4, 29.6, 26.4, 26.3, 26.1; IR (film):  $\nu$  = 3334, 1674, 1598, 1486, 1438, 1289, 1247, 1181, 1123, 1109, 1023 cm<sup>-1</sup>; LRMS (ESI)  $m/z$  478.2 {[M+H]<sup>+</sup>; calcd for C<sub>28</sub>H<sub>33</sub>NO<sub>4</sub>P, 478.2}; HRMS (EI)  $m/z$  394.1215 {[M-*c*-hexyl]<sup>+</sup>; calcd for C<sub>22</sub>H<sub>21</sub>NO<sub>4</sub>P, 394.1208}.

### Synthesis of (2*S*, 3*S*)-2-hydroxy-4-methyl-1-(1-naphthyl)-3-(*N*-diphenylphosphinoylamino)-1-pen-tanone (**5i**)

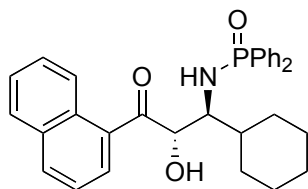

Compound **5i**: a pale yellow oil;  $R_f$  0.34 (EtOAc);  $t_r$  = 8.7 min (major) and 14.7 min (minor), (Chiralcel OD,  $\lambda$  = 254 nm, heptane/*i*-PrOH = 90:10, 1.0 mL/min);  $[\alpha]_D^{25}$  +8.03 (*c* 0.71, CHCl<sub>3</sub>, 88% ee); <sup>1</sup>H NMR (500 MHz, CDCl<sub>3</sub>)  $\delta$  8.56 (br d,  $J$  = 9.0 Hz, 1H), 8.04-7.91 (m, 6H), 7.87 (br d,  $J$  = 9.0 Hz, 1H), 7.62-7.38 (m, 9H), 5.56 (br d,  $J$  = 2.5 Hz, 1H), 4.79 (br s, 1H), 3.85 (dd,  $J$  = 11.8, 5.8 Hz, 1H), 3.25-3.16 (m, 1H), 1.80-1.63 (m, 1H), 0.97 (d,  $J$  = 6.8 Hz, 3H), 0.61 (d,  $J$  = 6.8 Hz, 3H); <sup>13</sup>C NMR (125 MHz, CDCl<sub>3</sub>)  $\delta$  203.4, 134.0, 134.0, 133.2, 132.7, 132.6, 132.2, 132.04, 132.02, 131.97, 131.9, 131.0, 130.4, 129.5, 128.8, 128.7, 128.50, 128.46, 128.40, 126.6, 125.3, 124.6, 78.2, 60.4, 30.4, 30.3, 21.2, 19.5; IR (film):  $\nu$  = 3331, 1681, 1508, 1439, 1244, 1180, 1070, 946 cm<sup>-1</sup>; HRMS (EI)  $m/z$  457.1789 [M<sup>+</sup>; calcd for C<sub>28</sub>H<sub>28</sub>NO<sub>3</sub>P, 457.1807].

### Synthesis of (2*S*, 3*S*)-2-hydroxy-4-methyl-1-(2-naphthyl)-3-(*N*-diphenylphosphinoylamino)-1-pen-tanone (**5j**)

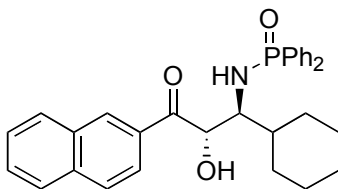

Compound **5j**: a white solid; m.p. 69-70 °C;  $R_f$  0.21 (Pet. ether/EtOAc 1:1);  $t_r$  = 7.8 min (major) and 12.1 min (minor), (Chiralcel OD,  $\lambda$  = 254 nm, heptane/*i*-PrOH = 90:10, 1.0 mL/min);  $[\alpha]_D^{23}$  -6.51 (*c* 3.07, CHCl<sub>3</sub>, 95% ee); <sup>1</sup>H NMR (500 MHz, CDCl<sub>3</sub>)  $\delta$  8.60 (s, 1H), 8.06-7.92 (m, 6H), 7.87-7.82 (m, 2H), 7.63-7.40 (m, 8H), 5.52 (br s, 1H), 5.14 (br s, 1H), 4.08 (dd,  $J$  = 12.0, 5.5 Hz, 1H), 3.35-3.26 (m, 1H), 1.86-1.72 (m, 1H), 0.99 (d,  $J$  = 7.0 Hz, 3H), 0.67 (d,  $J$  = 7.0 Hz, 3H); <sup>13</sup>C NMR (125 MHz, CDCl<sub>3</sub>)  $\delta$  200.5, 135.9, 133.0, 132.8, 132.7, 132.5, 132.28, 132.27, 132.1, 132.04, 132.00, 131.92, 131.90, 131.8, 131.3, 130.7, 130.0, 128.9, 128.8, 128.74, 128.68, 128.5, 128.4, 127.8, 126.9, 124.1, 76.0, 60.8, 30.4, 30.3, 21.3, 19.7; IR (film):  $\nu$  = 3333, 1676, 1627, 1594, 1469, 1439, 1413, 1388, 1278,

1188, 1121, 1071, 1028, 909  $\text{cm}^{-1}$ ; Anal. Calcd for  $\text{C}_{28}\text{H}_{28}\text{NO}_3\text{P}$ : C, 73.51; H, 6.17; N, 3.06. Found: C, 73.37; H, 5.94; N, 3.06.

### General procedure for the catalytic asymmetric Mannich-type reaction with Boc-imine **6** promoted by dinuclear zinc catalyst **2**.

4Å Crushed molecular sieves (60 mg) were flame-dried under vacuum. After cooling down to room temperature, ligand **1a** was added (10 mg, 0.015 mmol) and nitrogen gas was refilled. THF (0.3 mL) was then added. To this suspension was added dropwise a solution of diethylzinc (27  $\mu\text{L}$ , 0.03 mmol, 1.1 M in Toluene) at room temperature and allowed to stir for 30 minutes. A solution of 2-hydroxyacetophenone **3a** (82 mg, 0.60 mmol) in THF (0.35 mL) was then added and stirred for 2 min. After cooling down to  $-78\text{ }^\circ\text{C}$ , a solution of Boc-imine **6a** (63 mg, 0.3 mmol) in THF (0.35 mL) was added successively. After stirring at  $-78\text{ }^\circ\text{C}$  for 30 min, the reaction mixture was warmed up to  $5\text{ }^\circ\text{C}$  and stirred for 14 h. The reaction mixture was diluted with  $\text{Et}_2\text{O}$  (6 mL) and then a phosphate buffer (pH = 7) solution (3 mL) was added. After stirring for 30 minutes, the phases were separated and the aqueous phase was extracted with  $\text{Et}_2\text{O}$  (1 mL x 2). The combined organics were washed with brine (1.5 mL), dried over  $\text{MgSO}_4$ , filtered and concentrated to give a crude mixture of the Mannich products. The diastereomeric ratio was determined by  $^1\text{H}$  NMR analysis of the crude product. The crude mixture was purified by radial chromatography on a 1 mm plate using 1:4 EtOAc/Petroleum ether as eluents to yield desired amino alcohol **7a** (80 mg, 77% yield, *anti/syn* = 1:5.4, 94% ee (*syn* isomer)) and undesired compound **8a** (6 mg, 6% yield). The mixture of diastereomers can be separated by radial chromatography on a 1 mm plate using 70:30:1  $\text{CH}_2\text{Cl}_2$ /Petroleum ether/MeOH.

### Synthesis of (2*S*, 3*R*)-3-cyclohexyl-2-hydroxy-1-phenyl-3-(*N*-*tert*-butoxycarbonylamino)-1-propanone (**7a**)

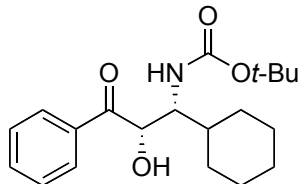

Compound **7a**: a colorless oil;  $R_f$  0.17 ( $\text{CH}_2\text{Cl}_2$ /Pet. ether/MeOH 70:30:1);  $t_r$  = 32.1 (major) min and 43.1 min (minor), (Chiralcel AD,  $\lambda$  = 254 nm, heptane/*i*-PrOH = 90:10, 0.8 mL/min);  $[\alpha]_D^{23}$  1.48 (*c* 9.67,  $\text{CHCl}_3$ , 90% ee);  $^1\text{H}$  NMR (500 MHz,  $\text{CDCl}_3$ )  $\delta$  7.87 (d,  $J$  = 7.5 Hz, 0.22x2H, rotamer), 7.83-7.78 (m, 0.78x2H), 7.64-7.55 (m, 1H), 7.53-7.43 (m, 2H), 5.27 (br dd,  $J$  = 5.0, 1.0 Hz, 0.78H), 5.22 (br d,  $J$  = 4.5 Hz, 0.22H, rotamer), 4.61 (d,  $J$  = 10.5 Hz, 0.78H), 4.35 (d,  $J$  = 10.5 Hz, 0.22H, rotamer), 3.97 (d,  $J$  = 4.5 Hz, 0.22H, rotamer), 3.93 (d,  $J$  = 5.0 Hz, 0.78H), 3.82-3.70 (m, 1H), 2.10-2.00 (m, 1H), 1.92-1.55 (m, 6H), 1.46-0.86 (m, 13H);  $^{13}\text{C}$  NMR (125 MHz,  $\text{CDCl}_3$ )  $\delta$  201.1, 155.2, 134.0, 133.9, 129.0, 128.9, 128.5, 128.3, 79.2, 72.6, 57.8, 40.3, 30.3, 29.7, 28.2, 27.7, 26.3, 26.14, 26.07; IR (film):  $\nu$  = 3444 br, 2928, 2853, 1698 br, 1599, 1580, 1498, 1450, 1366, 1269, 1172, 1125, 1054, 1019  $\text{cm}^{-1}$ ; LRMS (ESI)  $m/z$  370.2  $\{[\text{M}+\text{Na}]^+\}$ ; calcd for  $\text{C}_{20}\text{H}_{29}\text{NO}_4\text{Na}$ , 370.2; HRMS (EI)  $m/z$  274.1441  $\{[\text{M}-\text{O}t\text{-Bu}]^+\}$ ; calcd for  $\text{C}_{16}\text{H}_{20}\text{NO}_3$ , 274.1443. The relative stereochemistry of major diastereomer was determined to be *syn* by NOE observation (1.8%) as shown below, after conversion to the corresponding cyclic carbamate.<sup>s5,s6</sup> The absolute stereochemistry was determined by utilization of the amine in the O-methyl mandelic amide formation.<sup>s7</sup>

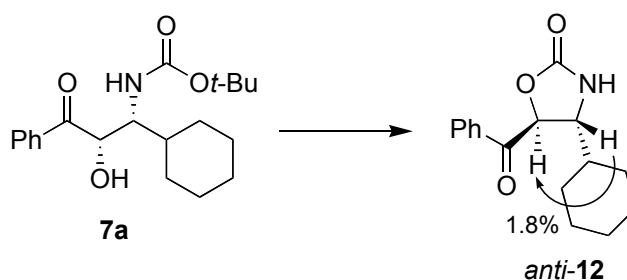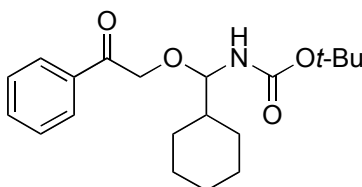

Compound **8a**: a semi white solid;  $^1\text{H}$  NMR (400 MHz,  $\text{CDCl}_3$ ):  $\delta$  7.90 (d,  $J = 7.4$  Hz, 2H), 7.57 (t,  $J = 7.4$  Hz, 1H), 7.45 (dd,  $J = 7.4, 7.4$  Hz, 2H), 4.94 (br d,  $J = 10.4$  Hz, 1H), 4.86 (s, 2H), 4.83 (dd,  $J = 10.4, 6.4$  Hz, 1H), 1.97-1.87 (m, 1H), 1.84-1.72 (m, 2H), 1.70-1.58 (m, 2H), 1.39 (s, 9H), 1.28-1.00 (m, 5H);  $^{13}\text{C}$  NMR (100 MHz,  $\text{CDCl}_3$ ):  $\delta$  196.7, 156.1, 135.3, 133.6, 128.8, 128.1, 86.3, 80.1, 71.1, 53.6, 42.8, 28.7, 28.4, 28.1, 26.51, 26.48, 26.0, 25.9; IR (film):  $\nu = 3345, 2927, 2854, 1704$  br, 1599, 1581, 1514, 1450, 1392, 1367, 1292, 1250, 1227, 1173, 1113, 1012, 979  $\text{cm}^{-1}$ .

#### Synthesis of (2*S*, 3*R*)-2-hydroxy-4-methyl-1-phenyl-3-(*N*-*tert*-butoxycarbonylamino)-1-pentanone (**7b**)

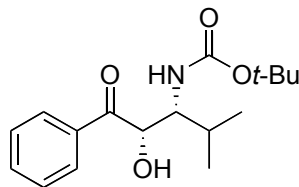

Compound **7b**: a colorless oil;  $R_f$  0.32 ( $\text{CH}_2\text{Cl}_2/\text{Pet. ether}/\text{MeOH}$  70:30:1, 2 elutions);  $t_r = 5.6$  min (major) and 10.4 min (minor), (Chiralcel OD,  $\lambda = 254$  nm, heptane/*i*-PrOH = 90:10, 1.0 mL/min);  $[\alpha]_D^{23} -15.27$  ( $c$  3.05,  $\text{CHCl}_3$ , 90% ee);  $^1\text{H}$  NMR (500 MHz,  $\text{CDCl}_3$ )  $\delta$  7.90 (d,  $J = 7.0$  Hz, 0.25x2H, rotamer), 7.83 (dd,  $J = 8.5, 1.0$  Hz, 0.75x2H), 7.67-7.58 (m, 1H), 7.57-7.46 (m, 2H), 5.27 (dd,  $J = 4.8, 1.3$  Hz, 0.75H), 5.23 (d,  $J = 4.8$  Hz, 0.25H, rotamer), 4.68 (d,  $J = 10.0$  Hz, 0.75H), 4.48 (d,  $J = 11.0$  Hz, 0.25H, rotamer), 4.01 (d,  $J = 4.8$  Hz, 0.25H, rotamer), 3.96 (d,  $J = 4.8$  Hz, 0.75H), 3.80-3.68 (m, 1H), 2.24-1.92 (m, 1H);  $^{13}\text{C}$  NMR (125 MHz,  $\text{CDCl}_3$ )  $\delta$  200.9, 155.2, 134.0, 133.9, 129.0, 128.9, 128.5, 128.3, 79.2, 73.1, 58.7, 31.3, 28.4, 28.2, 27.7, 20.1, 19.7, 19.5; IR (film):  $\nu = 3350, 3278, 2932, 2873, 1696$  br, 1599, 1503, 1451, 1391, 1366, 1264, 1173, 1089, 1004  $\text{cm}^{-1}$ ; LRMS (ESI)  $m/z$  330.2  $\{[\text{M}+\text{Na}]^+\}$ ; calcd for  $\text{C}_{17}\text{H}_{25}\text{NO}_4\text{Na}$ , 330.2; HRMS (EI)  $m/z$  234.1128  $\{[\text{M}-\text{Ot}-\text{Bu}]^+\}$ ; calcd for  $\text{C}_{13}\text{H}_{16}\text{NO}_3$ , 234.1130.

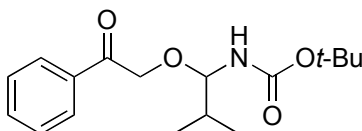

Compound **8b**: a semi white solid;  $^1\text{H}$  NMR (500 MHz,  $\text{CDCl}_3$ ):  $\delta$  7.91 (d,  $J = 7.5$  Hz, 2H), 7.57 (t,  $J = 7.5$  Hz, 1H), 7.45 (dd,  $J = 7.5, 7.5$  Hz, 2H), 4.92 (d,  $J = 10.5$  Hz, 1H), 4.88-4.81 (m, 3H), 2.04-1.92 (m, 1H), 1.39 (s, 9H), 1.02 (d,  $J = 7.0$  Hz, 3H), 0.98 (d,  $J = 7.0$  Hz, 3H);  $^{13}\text{C}$  NMR (125 MHz,  $\text{CDCl}_3$ ):  $\delta$

196.6, 155.9, 135.1, 133.4, 128.7, 128.0, 86.7, 80.0, 71.0, 33.1, 28.3, 18.1, 17.4; IR (film):  $\nu = 3347, 2975, 1705 \text{ br}, 1598, 1504, 1450, 1392, 1367, 1229, 1173, 1111, 1011, 978 \text{ cm}^{-1}$ .

### Establishment of relative and absolute stereochemistry of the amino alcohol derived from *N*-Dpp and *N*-Boc imine

#### Determination of the relative stereochemistry of the Mannich adducts<sup>s5,s6</sup>

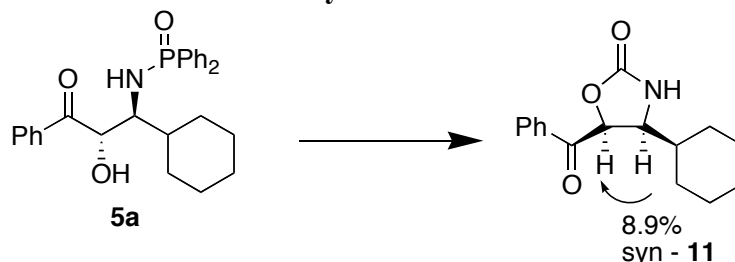

To a stirred solution of **5a** (250 mg, 0.558 mmol) in THF (3 mL) was added conc. HCl (3 mL, 0.69 mmol) at 0 °C. After stirring at room temperature for 1 h, the reaction mixture was basified with  $\text{K}_2\text{CO}_3$  (pH 10) and extracted with  $\text{CH}_2\text{Cl}_2$ . The combined organic extracts were washed with brine and dried over  $\text{MgSO}_4$ . The  $\text{CH}_2\text{Cl}_2$  solvent was evaporated under reduced pressure (to ~6 mL). After cooling to -78 °C, pyridine (73  $\mu\text{L}$ , 0.90 mmol) and triphosgene (134 mg, 0.45 mmol) in  $\text{CH}_2\text{Cl}_2$  (0.9 mL) were added slowly and stirred for 30 min at this temperature. The resulting solution was quenched with saturated aqueous  $\text{NaHCO}_3$  and extracted with ether. The combined organic extracts were washed successively with 1 N HCl, saturated aqueous  $\text{NaHCO}_3$ , brine and dried over  $\text{MgSO}_4$ . The solvent was evaporated under reduced pressure and the resulting residue was purified by silica gel column chromatography (EtOAc/Pet. ether 1:1) to give desired oxazolidinone *syn*-**11** (95 mg, 62 %) as white solid; m.p. 168-170 °C;  $R_f$  0.14 (EtOAc/Pet. ether 1:1);  $[\alpha]_D^{26} +3.93$  (c 1.79,  $\text{CHCl}_3$ );  $^1\text{H}$  NMR (500 MHz,  $\text{CDCl}_3$ )  $\delta$  7.96-7.91 (m, 2H), 7.62 (tt,  $J = 7.5, 1.3$  Hz, 1H), 7.53-7.47 (m, 2H), 6.62 (br d,  $J = 4.5$  Hz, 1H), 5.82 (d,  $J = 8.5$  Hz, 1H), 4.05 (dd,  $J = 8.5, 4.5$  Hz, 1H), 1.66-1.49 (m, 4H), 1.43-1.32 (m, 2H), 1.06-0.92 (m, 5H);  $^{13}\text{C}$  NMR (125 MHz,  $\text{CDCl}_3$ )  $\delta$  193.5, 159.2, 135.5, 134.2, 129.2, 128.4, 80.3, 61.1, 38.6, 30.5, 26.5, 25.9, 25.8, 25.4; IR (film):  $\nu = 3262, 1757, 1694, 1596, 1449, 1226, 1095, 971 \text{ cm}^{-1}$ ; LRMS (ESI)  $m/z$  274.2  $\{[M+H]^+\}$ ; calcd for  $\text{C}_{16}\text{H}_{20}\text{NO}_3$ , 274.2}; HRMS (EI)  $m/z$  168.1021  $\{[M-\text{PhCO}]^+\}$ ; calcd for  $\text{C}_9\text{H}_{14}\text{NO}_2$ , 168.1025}. The relative stereochemistry was confirmed by NOE experiment.

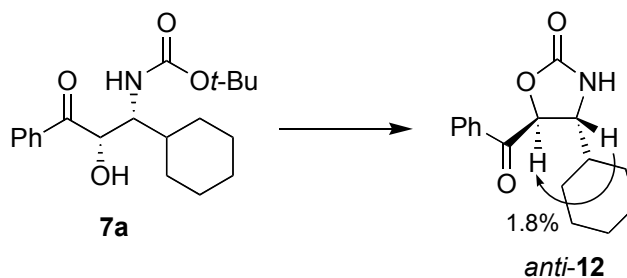

Compound *anti*-**12**: a white solid (87 %); m.p. 92-93 °C;  $R_f$  0.34 (EtOAc/Pet. ether 1:1);  $[\alpha]_D^{25} +93.18$  (c 3.85,  $\text{CHCl}_3$ );  $^1\text{H}$  NMR (500 MHz,  $\text{CDCl}_3$ )  $\delta$  8.02-7.94 (m, 2H), 7.62-7.55 (m, 1H), 7.50-7.42 (m, 2H), 7.07 (br s, 1H), 5.34 (d,  $J = 4.8$  Hz, 1H), 4.02 (dd,  $J = 5.0, 4.8$  Hz, 1H), 1.84-1.44 (m, 6H), 1.29-0.92 (m, 5H);  $^{13}\text{C}$  NMR (125 MHz,  $\text{CDCl}_3$ )  $\delta$  193.5, 158.6, 134.2, 134.1, 129.4, 128.9, 79.4, 58.4, 42.3, 28.7, 28.0, 26.0, 25.7, 25.6; IR (film):  $\nu = 3261, 1759, 1692, 1597, 1580, 1449, 1393, 1230, 1184, 1091, 1076, 974 \text{ cm}^{-1}$ ; HRMS (EI)  $m/z$  273.1368  $[M^+]$ ; calcd for  $\text{C}_{16}\text{H}_{19}\text{NO}_3$ , 273.1365]. The relative stereochemistry was confirmed by NOE experiment.



## Determination of the absolute stereochemistry of the Mannich adducts<sup>s6,s7</sup>

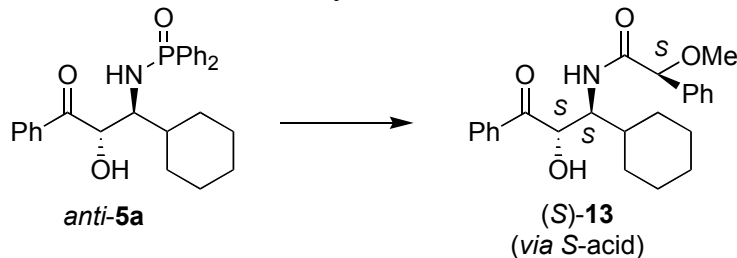

To a stirred solution of *anti*-**5a** (100 mg, 0.22 mmol) in THF (1.2 mL) was added conc. HCl (1.2 mL, 0.27 mmol) at 0 °C. After stirring at room temperature for 1 h, the reaction mixture was basified with K<sub>2</sub>CO<sub>3</sub> (pH 10) and extracted with CH<sub>2</sub>Cl<sub>2</sub>. The combined organic extracts were washed with brine and dried over MgSO<sub>4</sub>. The CH<sub>2</sub>Cl<sub>2</sub> solvent was evaporated under reduced pressure (to ~2 mL). To a solution of amine in CH<sub>2</sub>Cl<sub>2</sub> was then added (*S*)-*O*-methyl mandelic acid (36 mg, 0.22 mmol), 1-hydroxy benzotriazole (HOBT) (30 mg, 0.22 mmol), *i*-Pr<sub>2</sub>NEt (40 μL, 0.24 mmol) and 1-(3-dimethylaminopropyl)-3-ethylcarbodiimide hydrochloride (EDCI·HCl) (43 mg, 0.22 mmol), respectively. After stirring for 30 minutes at room temperature, the reaction was diluted with EtOAc (2 mL) and then washed with 1 M HCl (1 mLx2), NaHCO<sub>3</sub> (aq. Sat.) (1 mLx2), water (1 mL) and brine (2 mL). The organics were dried over MgSO<sub>4</sub>, filtered and concentrated to give an oil. Purification by flash chromatography on silica gel [Pet. ether/EtOAc 1:4] afforded a white solid (56 mg, 64%) of the mandelate amide (*S*)-**13** derived from the (*S*)-acid; m.p. 82-83 °C; R<sub>f</sub> 0.21 (EtOAc/Pet. ether 1:4); [α]<sub>D</sub><sup>25</sup> +105.17 (c 1.91, CHCl<sub>3</sub>); <sup>1</sup>H NMR (500 MHz, CDCl<sub>3</sub>) δ 8.15 (dd, *J* = 8.2, 1.2 Hz, 2H), 7.61 (tt, *J* = 7.8, 1.2 Hz, 1H), 7.51 (dd, *J* = 8.2, 7.8 Hz, 2H), 7.44-7.30 (m, 5H), 5.22 (dd, *J* = 5.2, 2.8 Hz, 1H), 4.63 (s, 1H), 4.29 (ddd, *J* = 9.3, 6.6, 2.8 Hz, 1H), 4.00 (d, *J* = 5.2 Hz, 1H), 3.37 (s, 3H), 1.86-1.78 (m, 1H), 1.72-1.42 (m, 4H), 1.33-1.24 (m, 1H), 1.22-0.84 (m, 4H), 0.70-0.58 (m, 1H); <sup>13</sup>C NMR (125 MHz, CDCl<sub>3</sub>) δ 200.5, 170.8, 137.1, 134.3, 133.8, 129.11, 129.06, 128.7, 128.6, 127.2, 84.0, 76.5, 57.2, 56.8, 37.5, 30.6, 29.2, 25.9; IR (film): ν = 3411, 2926, 2852, 1673 br, 1597, 1514, 1450, 1264, 1100, 973 cm<sup>-1</sup>; LRMS (ESI) *m/z* 418.2 {[M+Na]<sup>+</sup>; calcd for C<sub>24</sub>H<sub>29</sub>NO<sub>4</sub>Na, 418.2}; HRMS (EI) *m/z* 290.1744 {[M-COPh]<sup>+</sup>; calcd for C<sub>17</sub>H<sub>24</sub>NO<sub>3</sub>, 290.1756}; Anal. Calcd for C<sub>17</sub>H<sub>24</sub>NO<sub>3</sub>: C, 72.89; H, 7.39; N, 3.54. Found: C, 72.79; H, 7.24; N, 3.34.

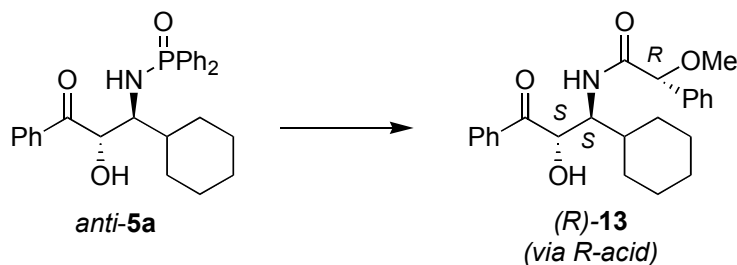

Compound (*R*)-**13** derived from the (*R*)-*O*-methyl mandelic acid: a colorless oil (48 mg, 55%); R<sub>f</sub> 0.30 (EtOAc/Pet. ether 1:4); [α]<sub>D</sub><sup>25</sup> -4.68 (c 2.16, CHCl<sub>3</sub>); <sup>1</sup>H NMR (500 MHz, CDCl<sub>3</sub>) δ 8.09 (dd, *J* = 8.2, 1.0 Hz, 2H), 7.60 (tt, *J* = 7.7, 1.0 Hz, 1H), 7.49 (dd, *J* = 8.2, 7.7 Hz, 2H), 7.46-7.30 (m, 5H), 5.06 (dd, *J* = 5.0, 2.8 Hz, 1H), 4.68 (s, 1H), 4.33 (ddd, *J* = 9.3, 6.5, 2.8 Hz, 1H), 3.92 (d, *J* = 5.0 Hz, 1H), 3.38 (s, 3H), 1.90-1.82 (m, 1H), 1.74-1.66 (m, 1H), 1.60-1.50 (m, 3H), 1.39-1.31 (m, 1H), 1.23-0.92 (m, 4H), 0.82-0.72 (m, 1H); <sup>13</sup>C NMR (125 MHz, CDCl<sub>3</sub>) δ 200.4, 170.8, 137.1, 134.3, 133.7, 129.1, 129.0, 128.8, 128.7, 127.4, 83.9, 76.3, 57.2, 56.8, 37.7, 30.7, 29.3, 26.0, 25.9; IR (film): ν = 3412, 2926, 2853, 1674 br, 1598, 1517, 1450, 1268, 1099, 974 cm<sup>-1</sup>; HRMS (EI) *m/z* 396.2173 {[M+H]<sup>+</sup>; calcd for C<sub>24</sub>H<sub>30</sub>NO<sub>4</sub>, 396.2175}.

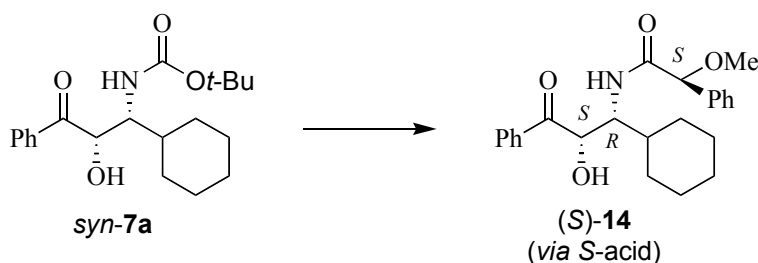

To a stirred solution of *syn-7a* (140 mg, 0.4 mmol) in THF (2.1 mL) was added conc. HCl (2.1 mL, 0.48 mmol) at 0 °C. After stirring at room temperature for 1 h, the reaction mixture was basified with K<sub>2</sub>CO<sub>3</sub> (pH 10) and extracted with CH<sub>2</sub>Cl<sub>2</sub>. The combined organic extracts were washed with brine and dried over MgSO<sub>4</sub>. The CH<sub>2</sub>Cl<sub>2</sub> solvent was evaporated under reduced pressure (to ~3 mL). To a solution of amine in CH<sub>2</sub>Cl<sub>2</sub> was then added (*S*)-*O*-methyl mandelic acid (65 mg, 0.4 mmol), 1-hydroxy benzotriazole (HOBT) (55 mg, 0.4 mmol), *i*-Pr<sub>2</sub>NEt (75 μL, 0.44 mmol) and 1-(3-dimethylaminopropyl)-3-ethylcarbodiimide hydrochloride (EDCI·HCl) (78 mg, 0.4 mmol), respectively. After stirring for 30 minutes at room temperature, the reaction was diluted with EtOAc (4 mL) and then washed with 1 M HCl (2 mLx2), NaHCO<sub>3</sub> (aq. Sat.) (2 mLx2), water (2 mL) and brine (4 mL). The organics were dried over MgSO<sub>4</sub>, filtered and concentrated to give an oil. Purification by flash chromatography on silica gel [Pet. ether/EtOAc 1:4] afforded a white solid (110 mg, 70%) of the mandelate amide (*S*)-**14** derived from the (*S*)-acid; m.p. 108-109 °C; R<sub>f</sub> 0.27 (EtOAc/Pet. ether 1:4); [α]<sub>D</sub><sup>24</sup> -23.47 (c 3.31, CHCl<sub>3</sub>); <sup>1</sup>H NMR (500 MHz, CDCl<sub>3</sub>) δ 7.48-7.42 (m, 3H), 7.41-7.32 (m, 3H), 7.31-7.25 (m, 4H), 6.83 (d, *J* = 10.0 Hz, 1H), 5.29 (dd, *J* = 4.5, 1.0 Hz, 1H), 4.45 (s, 1H), 4.12 (d, *J* = 4.5 Hz, 1H), 4.11-4.06 (m, 1H), 3.29 (s, 3H), 2.15-2.07 (m, 1H), 1.88-1.65 (m, 5H), 1.40-1.14 (m, 4H), 1.11-0.98 (m, 1H); <sup>13</sup>C NMR (125 MHz, CDCl<sub>3</sub>) δ 200.6, 169.7, 137.0, 133.8, 133.2, 128.6, 128.3, 128.2, 128.1, 127.1, 83.6, 72.2, 57.0, 55.4, 39.8, 30.0, 29.6, 26.1, 26.0, 25.9; IR (film): ν 3411, 2929, 2852, 1683 br, 1598, 1513, 1450, 1268, 1196, 1146, 1100, 991 cm<sup>-1</sup>; HRMS (EI) *m/z* 396.2174 {[M+H]<sup>+</sup>; calcd for C<sub>24</sub>H<sub>30</sub>NO<sub>4</sub>, 396.2175}; Anal. Calcd for C<sub>24</sub>H<sub>29</sub>NO<sub>4</sub>: C, 72.89; H, 7.39; N, 3.54. Found: C, 72.70; H, 7.19; N, 3.44.

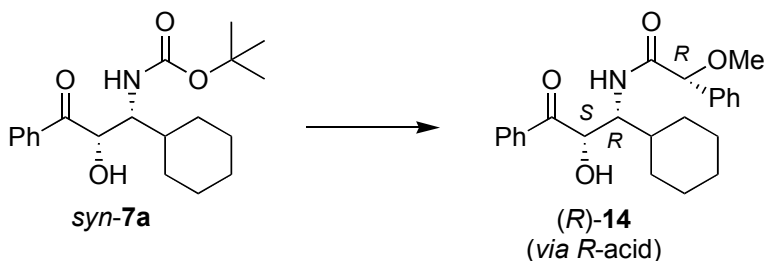

Compound (*R*)-**14** derived from the (*R*)-*O*-methyl mandelic acid: a white solid (99 mg, 63 %); m.p. 59-60 °C; R<sub>f</sub> 0.24 (EtOAc/Pet. ether 1:4); [α]<sub>D</sub><sup>23</sup> 31.35 (c 7.48, CHCl<sub>3</sub>); <sup>1</sup>H NMR (500 MHz, CDCl<sub>3</sub>) δ 7.86 (d, *J* = 7.8 Hz, 2H), 7.56 (t, *J* = 7.6 Hz, 1H), 7.47 (dd, *J* = 7.8, 7.6 Hz, 2H), 7.34-7.21 (m, 5H), 6.83 (d, *J* = 9.8 Hz, 1H), 5.34 (d, *J* = 5.0 Hz, 1H), 4.48 (s, 1H), 4.10 (dd, *J* = 9.8, 9.2 Hz, 1H), 4.05 (d, *J* = 5.0 Hz, 1H), 3.39 (s, 3H), 2.11-2.02 (m, 1H), 1.86-1.68 (m, 2H), 1.67-1.51 (m, 3H), 1.35-1.04 (m, 4H), 0.87-0.77 (m, 1H); <sup>13</sup>C NMR (125 MHz, CDCl<sub>3</sub>) δ 200.5, 170.1, 137.2, 134.1, 133.4, 128.9, 128.4, 128.3, 128.2, 126.6, 83.7, 72.2, 57.6, 55.6, 40.1, 30.1, 29.3, 26.1, 26.0, 25.8; IR (film): ν = 3411, 2928, 2852, 1682 br, 1598, 1513, 1449, 1268, 1197, 1146, 1100, 990 cm<sup>-1</sup>; HRMS (EI) *m/z* 396.2183 {[M+H]<sup>+</sup>; calcd for C<sub>24</sub>H<sub>30</sub>NO<sub>4</sub>, 396.2175}.

## References:

- (s1) Trost, B. M.; Ito, H. *J. Am. Chem. Soc.* **2000**, *122*, 12003-12004.
- (s2) Côté, A.; Boezio, A. A.; Charette, A. B. *Proc. Natl. Acad. Sci. U.S.A.* **2004**, *101*, 5405-5410.
- (s3) Pearson, W. H.; Lindbeck, A. C.; Kampf, J. W. *J. Am. Chem. Soc.* **1993**, *115*, 2622-2636.
- (s4) Mecozzi, T.; Petrini, M. *J. Org. Chem.* **1999**, *64*, 8970-8972.
- (s5) Murakami, M.; Ito, H.; Ito, Y. *J. Org. Chem.* **1993**, *58*, 6766-6770.
- (s6) Matsunaga, S.; Yoshida, T.; Morimoto, H.; Kumagai, N.; Shibasaki, M. *J. Am. Chem. Soc.* **2004**, *126*, 8777-8785.
- (s7) Trost, B. M.; Bunt, R. C.; Pulley, S. R. *J. Org. Chem.* **1994**, *59*, 4202-4205.
